# Supplementary material
Source: Springer Nature journal article supplement (https://www.springermedizin.de/resource/supplementary/12911_2011_571_MOESM1_ESM.pdf/9526140)

Experience and feelings: insecurity, anxiety, helplessness, frustration, distress, uncertainty, lonely

**Lacking support and information**

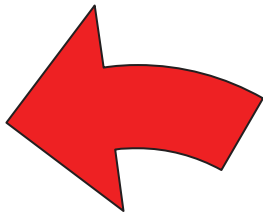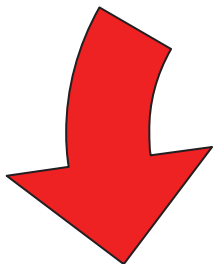

Affects the process of coping: unprepared, difficult to cope, constantly wondering, suffers in silence and anxiety

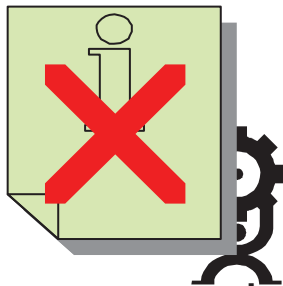

**Inability to be active**

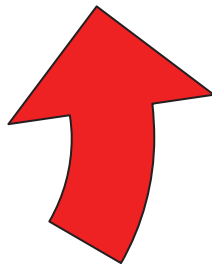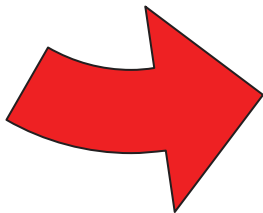

Supplement: MOESM1 [file 9526140]
